# Supplementary material for: Angular scattering of the Sahara dust aerosol
Source: Copernicus journal article supplement (doi:10.5194/acp-18-17735-2018), 2018-12-13
Supplement: Supplementary file 1 [file acp-18-17735-2018-supplement.zip]

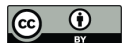

## *Supplement of* **Angular scattering of the Sahara dust aerosol**

**Helmuth Horvath et al.**

*Correspondence to:* Helmuth Horvath ([helmuth.horvath@univie.ac.at](mailto:helmuth.horvath@univie.ac.at))

- [acp-18-17735-2018-supplement-title-page.pdf](#)
- [measured\\_scatt\\_func.xlsx](#)

The copyright of individual parts of the supplement might differ from the CC BY 4.0 License.
